# Supplementary material
Source: HighWire-hosted journal article supplement (https://www.cmajopen.ca/highwire/filestream/81280/field_highwire_adjunct_files/3/2018-0165-4-at.pdf)
Supplement: 2018-0165-4-at.pdf [file 2018-0165-4-at.pdf]

## **Appendix 4 (as supplied by the authors): Interview guide**

### **Semi-structured interview guide for PCN practitioners**

Following standard qualitative practice, interview guides will be informed by study analysis and will therefore be subject to change as needed. As semi-structured interviews deliberately allow for participants and interviewers to adjust interview focus according to responses and participant interests, not all interviews will follow the same format. Interviews will be led by the same general areas and questions of focus as given below, time sensitivity may mean not all of these areas are covered in interviews. (Duration approximately 1 hour.)

#### **1. Background information:**

- Tell me about your role in the PCN?
- How long have you been working with the PCN?
- Can you tell me about a typical work week, what kind of tasks you do, what work do you do with other PCN staff?
- What was your experience with the 5As program previous to this study?

#### **2. 5As Questions:**

- Can you describe your experience with the 5As framework?
- How do you feel about the 5As framework and tool kit? (is there a need?)
- Tell me about your experience of the 5As training day? How have you found the sessions?
- What have been your experiences with 5As implementation?
- Do you anticipate this influencing how you interact with patients who are actively managing their weight? (ask to expand)
- What would influence your use of the 5As, or increase the usefulness of the intervention? (do you have everything you need? Skills, resources, information?)
- When appropriate, do you routinely ask patients to discuss their weight? (Why? not?)
- How confident are you at discussing the root causes or obesity with patients?
- How would they recommend that we change the 5As (external to this interview can we go through this with you)

#### **3. Team Effectiveness:**

- Do and your coworkers have the skills and information necessary to implement this framework?
- Do you think you share an understanding with your coworkers regarding an approach to obesity management?
- Do you notice a difference in how providers at the clinics you attend deal with weight management? (does this influence your work?)
- How is the communication between members of your clinic who are working with the 5As framework?

#### **4. Innovations Questions:**

- How does the 5As framework fit your own values/priorities, or with the values/priorities of your clinic?
- How does the 5As framework fit with existing programs and support? Are there any conflicting components of the 5As framework?
- What are some of the underlying barriers to in-clinic weight management that you are aware of?
- How have you tried to address these barriers in the past?

#### **5. Implementation Questions:**

How would you describe the support you receive by PCN management and your own clinic?
